# Supplementary material for: Effects of Eugenol on Water Quality and the Metabolism and Antioxidant Capacity of Juvenile Greater Amberjack (Seriola dumerili) under Simulated Transport Conditions
Source: MDPI journal article supplement (doi:10.3390/ani12202880), 2022-10-21
Supplement: s1 [file s1]

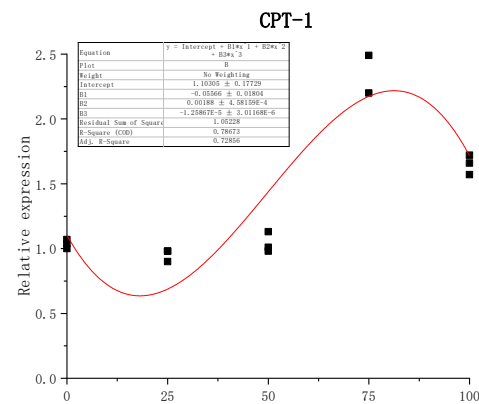

a1

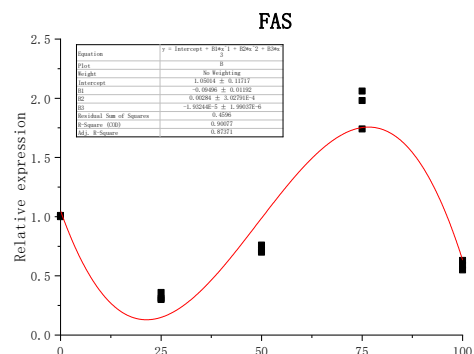

a2

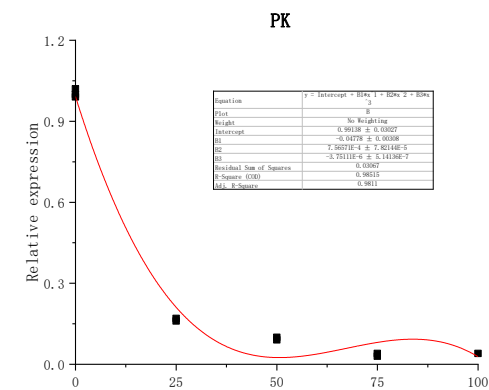

a3

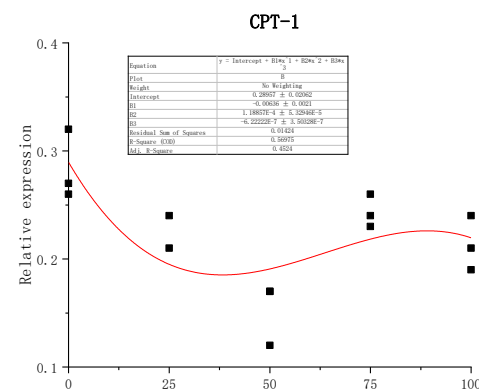

b1

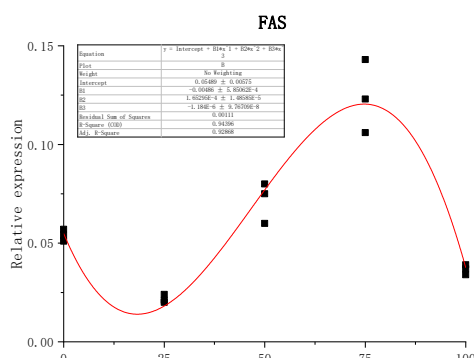

b2

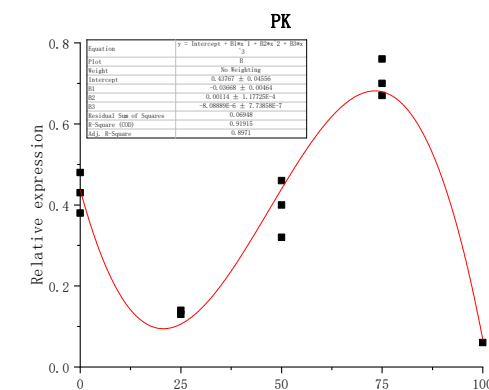

b3

**Figure S1. (I)** Linear regression equations between eugenol and the relative expression of CPT-1, FAS, and PK in liver (a1, a2, a3) and gill (b1, b2, b3) tissues of the greater amberjack.

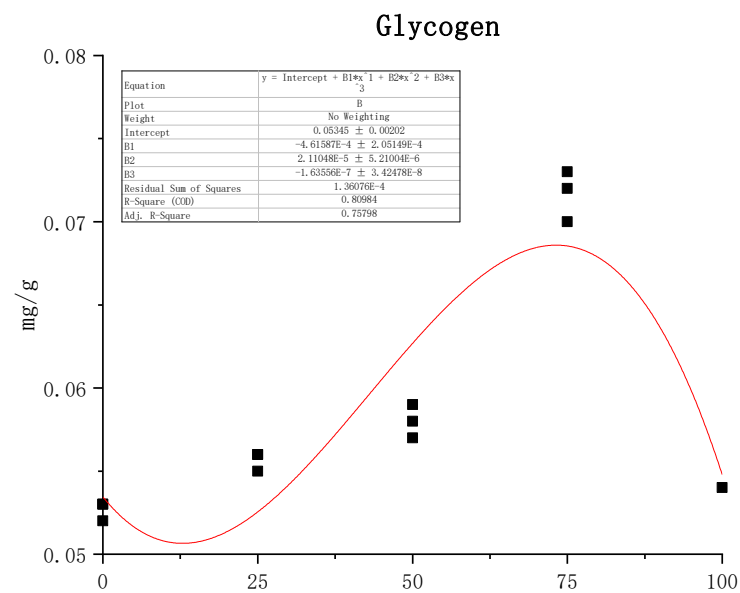

a

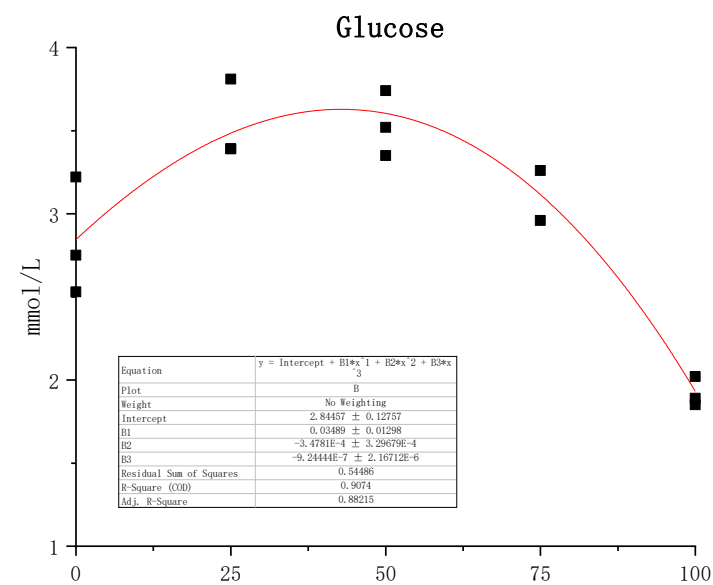

b

**Figure S1. (II)** Linear regression equations of eugenol with liver glycogen (a) and serum glucose (b) concentrations in greater amberjack under simulated transport conditions.

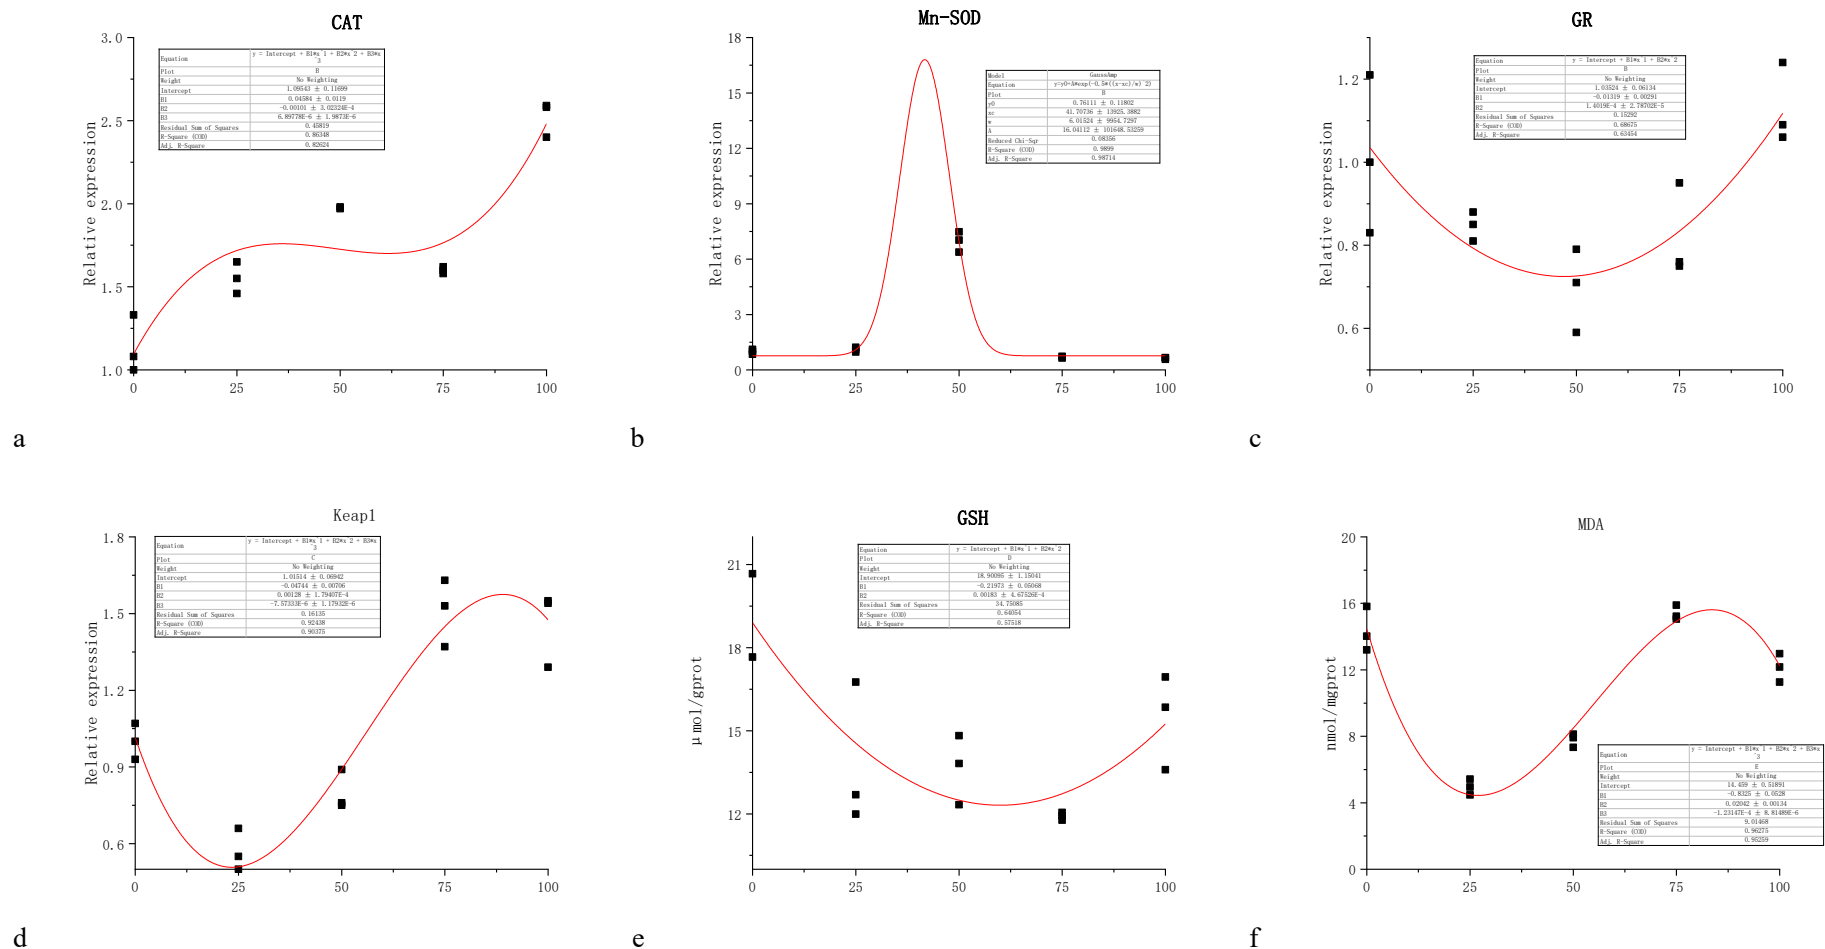

**Figure S1. (III) Linear regression equations of eugenol on antioxidant-related genes (a: CAT; b: Mn-SOD; c: GR; d: Keap1) and antioxidant-related enzymes (e: GSH; f: MDA) in the liver of the greater amberjack under simulated transport conditions.**

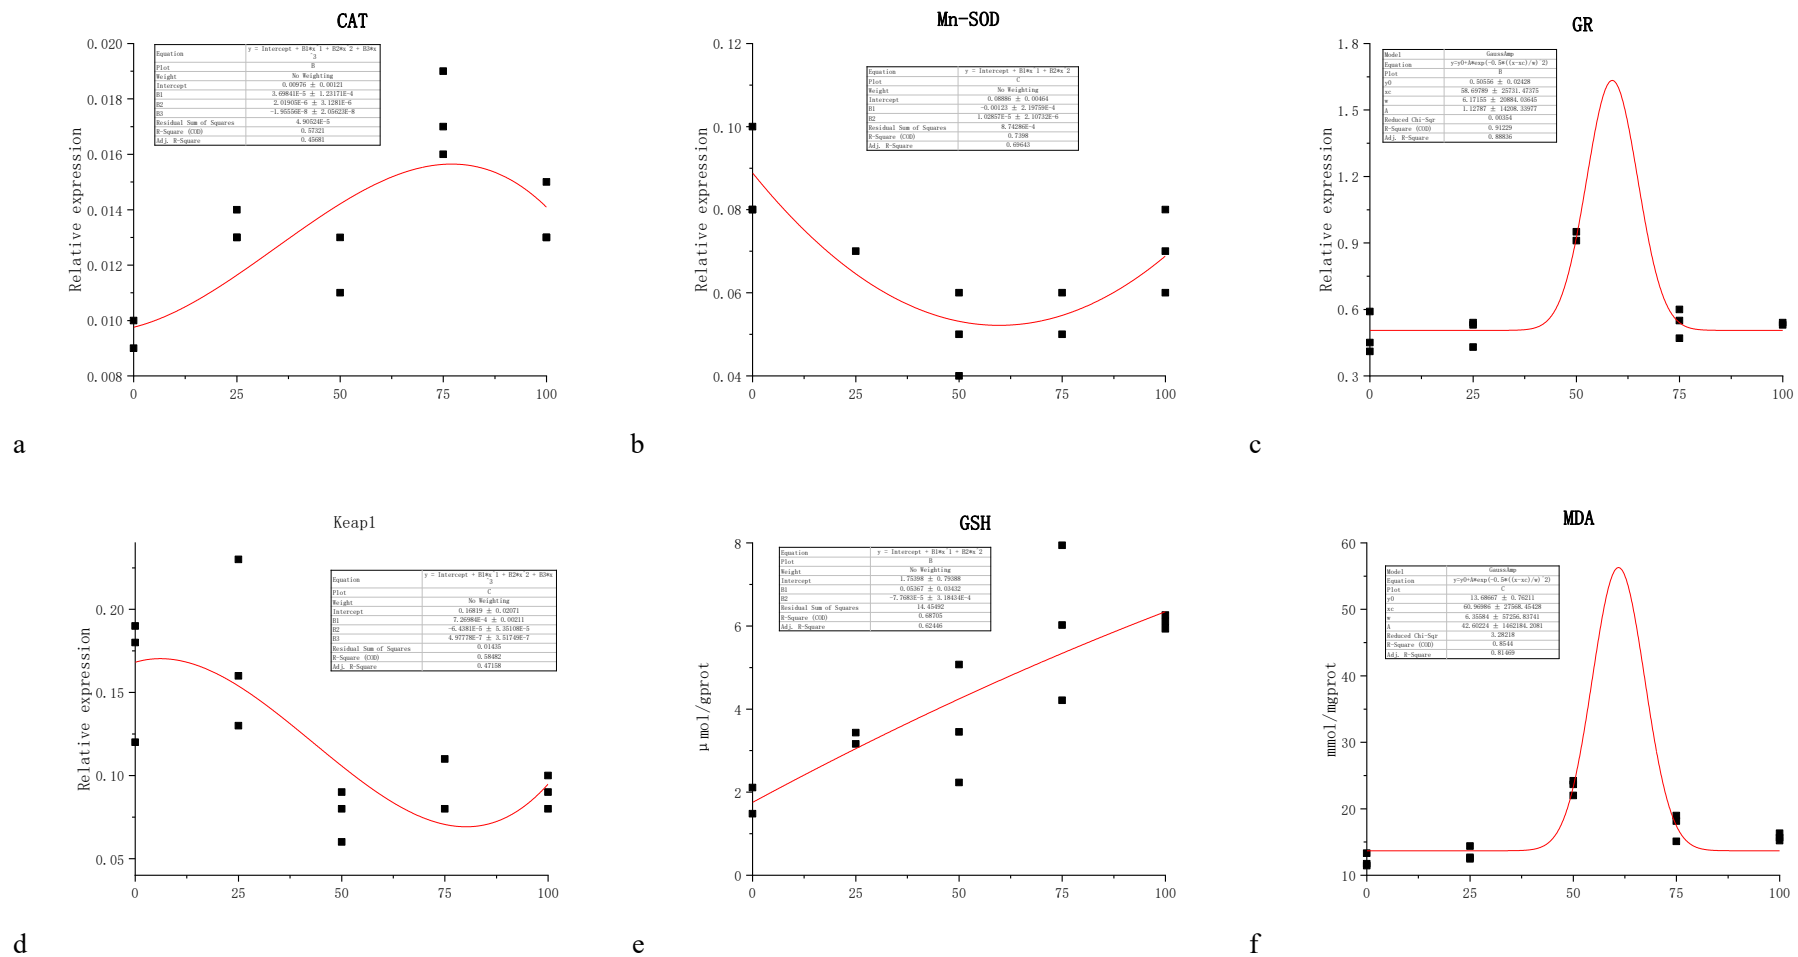

**Figure S1.** (IV) Linear regression equations of eugenol on antioxidant-related genes (a: CAT; b: Mn-SOD; c: GR; d: Keap1) and antioxidant-related enzymes (e: GSH; f: MDA) in the gill of the greater amberjack under simulated transport conditions.
